# Supplementary material
Source: publisher site journal article supplement (https://www.dovepress.com/article/447040)
Supplement: Supplementary file 1 [file get_supplementary_file.php]

Additional File 1: Survey on the screening and management of age-related hearing loss in community health services

Dear general practitioners:

We are conducting a questionnaire survey on the awareness of general practitioners in screening and managing on age-related hearing loss in Shanghai. You are invited to complete this 10-minute questionnaire. We hope to learn your experience and perceptions, which will help us determine how general practitioners (GPs) can effectively detect and manage age-related hearing loss (ARHL) in Shanghai. The survey is completely voluntary and anonymously. Your responses will only be used for academic research.

If you are interested in the survey, please read the following information statement carefully. Thank you very much for your participation.

Please make sure whether you`d like to take this survey：

1) Yes

2) No

**Participant characteristics**

1. Gender

☐ Female

☐ Male

1. Age

☐ 20-29
☐ 30-39
☐ 40-49
☐ ≥ 50

1. Marital status

☐ Unmarried

☐ Married

☐ other

1. Educational level

☐ Below bachelor

☐ Bachelor

☐ Postgraduate

1. Professional title

☐ Primary

☐ Middle

☐ Senior

1. Years of GP experience (year)

☐ < 5
☐ 5-9
☐ 10-14
☐ ≥15

1. Unit of working

☐ Urban of Pudong district, Shanghai

☐ Suburb of Pudong district, Shanghai

☐ Urban of Puxi district, Shanghai

☐ Suburb of Puxi district, Shanghai

1. Daily visiting patients

☐ < 50

☐ 50-69

☐ 70-89

☐ 90-109

☐ ≥110

1. Proportion of patients with self-reported hearing loss over the past month

☐ <10%

☐ 10-29%

☐ ≥ 30%

☐ Unsure

1. ARHL detection and management experience or training

☐ Yes

☐ No

**Knowledge of GPs toward ARHL screening and management**

1. What is the estimated percentage of older adults (over 60 years) who have ARHL?

☐ <10%

☐ 10-29%

☐ ≥ 30%

1. The characteristics of ARHL are?

☐ It is a type of sensorineural hearing loss

☐ It is mainly characterized by high-frequency hearing loss in the early stage

☐ It is one of the three common health problems for older adults

☐ Be accompanied by tinnitus

☐ All of the above

☐ Unsure

1. Which is not a modifiable risk factors that affects ARHL?

☐ lack of exercise

☐ Ototoxic drug use

☐ noise

☐ moderate smoking and drinking

☐ Chronic diseases (hypertension, diabetes, hyperlipidemia)

☐ All of the above

☐ Unsure

1. Common tools for ARHL screening include？

☐ Pure tone audiometry

☐ Otoacoustic emission

☐ Hearing handicap inventory for the elderly（HHIE）

☐ Speech Audiometry

☐ All of the above

☐ Unsure

1. The classification criteria for hearing loss are?

☐ The average of the pure tone audiometry thresholds (0.5kHz, 1kHz, 2kHz, 4kHz) of better ears is used as the grading standard

☐ ≤ 25dB/HL is normal

☐ 26-40dB/HL mild hearing loss; 41-60dB/HL moderate hearing loss;61-80 dB/HL severe hearing loss; ≥ 81dB/HL profound hearing loss

☐ Unsure

1. Which of the following are hazards of ARHL?

☐ Decreased speech communication ability

☐ Decreased cognitive ability

☐ Decreased emotional and social communication ability

☐ and decreased risk avoidance ability

☐ All of the above

☐ Unsure

1. Which statement is false concerning treatment of ARHL?

☐ Hearing aids are the main treatment option

☐ There is no focalization drug treatment currently

☐ It is important to rule out and treat reversible risks

☐ The hearing function may reverse automatically in some ARHL cases

☐ Unsure

**Attitudes of GPs toward ARHL detection and management**

|  | Strongly disagree | Disagree | Unsure | Agree | Strongly Agree |
| --- | --- | --- | --- | --- | --- |
| 1. ARHL is not a degenerative aging process but a disease. | ☐ | ☐ | ☐ | ☐ | ☐ |
| 1. All older adults suspected of ARHL should undergo a diagnostic evaluation. | ☐ | ☐ | ☐ | ☐ | ☐ |
| 1. There are more advantages than disadvantages to screening if someone has ARHL. | ☐ | ☐ | ☐ | ☐ | ☐ |
| 1. Early recognition and management can reduce the harm caused by ARHL. | ☐ | ☐ | ☐ | ☐ | ☐ |
| 1. There are more advantages than disadvantages to manage ARHL patients with risk. | ☐ | ☐ | ☐ | ☐ | ☐ |
| 1. There are more advantages than disadvantages to treat ARHL patients with hearing aids, cochlear implants, etc. | ☐ | ☐ | ☐ | ☐ | ☐ |
| 1. Older adults with ARHL can be a drain on medical and social resources. | ☐ | ☐ | ☐ | ☐ | ☐ |
| 1. Disclosure of ARHL could cause stress and frustration to patients and their families. | ☐ | ☐ | ☐ | ☐ | ☐ |
| 1. Disclosure of ARHL could cause embarrassment or discomfort for doctors. | ☐ | ☐ | ☐ | ☐ | ☐ |
| 1. Detection and management of ARHL will provide no economic benefits. | ☐ | ☐ | ☐ | ☐ | ☐ |
| 1. It`s GPs duty to recognize ARHL in the community health center. | ☐ | ☐ | ☐ | ☐ | ☐ |
| 1. It`s GPs responsibility to managing ARHL in the community health center. | ☐ | ☐ | ☐ | ☐ | ☐ |

**Practice of GPs toward ARHL detection and management**

| Alerting practice | Yes | No | Unsure |  |  |
| --- | --- | --- | --- | --- | --- |
| 1. I would take tinnitus as the criteria for ARHL detection. | ☐ | ☐ | ☐ |  |  |
| 1. I would take difficulty in listening under noise environment as the criteria for ARHL detection. | ☐ | ☐ | ☐ |  |  |
| Confirmation practice | Never/not applicable | Seldom | Sometimes | Usually | Always |
| 1. I would gather if a patient has family history of hearing loss disease. | ☐ | ☐ | ☐ | ☐ | ☐ |
| 1. I would detect risk factors of ARHL. | ☐ | ☐ | ☐ | ☐ | ☐ |
| 1. I would utilize the screening methods of ARHL. | ☐ | ☐ | ☐ | ☐ | ☐ |
| 1. I would get specialist advice for final diagnosis by referral. | ☐ | ☐ | ☐ | ☐ | ☐ |
| Management practice | Never/not applicable | Seldom | Sometimes | Usually | Always |
| 1. I would discuss the probable diagnosis with the patient. | ☐ | ☐ | ☐ | ☐ | ☐ |
| 1. I would discuss the probable diagnosis with the family members | ☐ | ☐ | ☐ | ☐ | ☐ |
| 1. I would coordinate support services. | ☐ | ☐ | ☐ | ☐ | ☐ |
| 1. I would provide non-pharmacological interventions. | ☐ | ☐ | ☐ | ☐ | ☐ |
